# Supplementary material for: Double Digest RADseq: An Inexpensive Method for De Novo SNP Discovery and Genotyping in Model and Non-Model Species
Source: PLoS One. 2012 May 31;7(5):e37135. doi: 10.1371/journal.pone.0037135 (PMC3365034; doi:10.1371/journal.pone.0037135)
Supplement: Sequences S1 — Oligonucleotide sequences. This Microsoft Excel spreadsheet documents all sequences of PCR primer and adapter oligonucleotides for experiments described in this work. (XLS) [file pone.0037135.s002.xls]

## Sheet: adapter_P1-EcoRI
Name	OligoSequence
GCATG_EcoRI_P1.1	ACACTCTTTCCCTACACGACGCTCTTCCGATCTGCATG
AACCA_EcoRI_P1.1	ACACTCTTTCCCTACACGACGCTCTTCCGATCTAACCA
CGATC_EcoRI_P1.1	ACACTCTTTCCCTACACGACGCTCTTCCGATCTCGATC
TCGAT_EcoRI_P1.1	ACACTCTTTCCCTACACGACGCTCTTCCGATCTTCGAT
TGCAT_EcoRI_P1.1	ACACTCTTTCCCTACACGACGCTCTTCCGATCTTGCAT
CAACC_EcoRI_P1.1	ACACTCTTTCCCTACACGACGCTCTTCCGATCTCAACC
GGTTG_EcoRI_P1.1	ACACTCTTTCCCTACACGACGCTCTTCCGATCTGGTTG
AAGGA_EcoRI_P1.1	ACACTCTTTCCCTACACGACGCTCTTCCGATCTAAGGA
AGCTA_EcoRI_P1.1	ACACTCTTTCCCTACACGACGCTCTTCCGATCTAGCTA
ACACA_EcoRI_P1.1	ACACTCTTTCCCTACACGACGCTCTTCCGATCTACACA
AATTA_EcoRI_P1.1	ACACTCTTTCCCTACACGACGCTCTTCCGATCTAATTA
ACGGT_EcoRI_P1.1	ACACTCTTTCCCTACACGACGCTCTTCCGATCTACGGT
ACTGG_EcoRI_P1.1	ACACTCTTTCCCTACACGACGCTCTTCCGATCTACTGG
ACTTC_EcoRI_P1.1	ACACTCTTTCCCTACACGACGCTCTTCCGATCTACTTC
ATACG_EcoRI_P1.1	ACACTCTTTCCCTACACGACGCTCTTCCGATCTATACG
ATGAG_EcoRI_P1.1	ACACTCTTTCCCTACACGACGCTCTTCCGATCTATGAG
ATTAC_EcoRI_P1.1	ACACTCTTTCCCTACACGACGCTCTTCCGATCTATTAC
CATAT_EcoRI_P1.1	ACACTCTTTCCCTACACGACGCTCTTCCGATCTCATAT
CGAAT_EcoRI_P1.1	ACACTCTTTCCCTACACGACGCTCTTCCGATCTCGAAT
CGGCT_EcoRI_P1.1	ACACTCTTTCCCTACACGACGCTCTTCCGATCTCGGCT
CGGTA_EcoRI_P1.1	ACACTCTTTCCCTACACGACGCTCTTCCGATCTCGGTA
CGTAC_EcoRI_P1.1	ACACTCTTTCCCTACACGACGCTCTTCCGATCTCGTAC
CGTCG_EcoRI_P1.1	ACACTCTTTCCCTACACGACGCTCTTCCGATCTCGTCG
CTGAT_EcoRI_P1.1	ACACTCTTTCCCTACACGACGCTCTTCCGATCTCTGAT
CTGCG_EcoRI_P1.1	ACACTCTTTCCCTACACGACGCTCTTCCGATCTCTGCG
CTGTC_EcoRI_P1.1	ACACTCTTTCCCTACACGACGCTCTTCCGATCTCTGTC
CTTGG_EcoRI_P1.1	ACACTCTTTCCCTACACGACGCTCTTCCGATCTCTTGG
GACAC_EcoRI_P1.1	ACACTCTTTCCCTACACGACGCTCTTCCGATCTGACAC
GAGAT_EcoRI_P1.1	ACACTCTTTCCCTACACGACGCTCTTCCGATCTGAGAT
GAGTC_EcoRI_P1.1	ACACTCTTTCCCTACACGACGCTCTTCCGATCTGAGTC
GCCGT_EcoRI_P1.1	ACACTCTTTCCCTACACGACGCTCTTCCGATCTGCCGT
GCTGA_EcoRI_P1.1	ACACTCTTTCCCTACACGACGCTCTTCCGATCTGCTGA
GGATA_EcoRI_P1.1	ACACTCTTTCCCTACACGACGCTCTTCCGATCTGGATA
GGCCA_EcoRI_P1.1	ACACTCTTTCCCTACACGACGCTCTTCCGATCTGGCCA
GGCTC_EcoRI_P1.1	ACACTCTTTCCCTACACGACGCTCTTCCGATCTGGCTC
GTAGT_EcoRI_P1.1	ACACTCTTTCCCTACACGACGCTCTTCCGATCTGTAGT
GTCCG_EcoRI_P1.1	ACACTCTTTCCCTACACGACGCTCTTCCGATCTGTCCG
GTCGA_EcoRI_P1.1	ACACTCTTTCCCTACACGACGCTCTTCCGATCTGTCGA
TACCG_EcoRI_P1.1	ACACTCTTTCCCTACACGACGCTCTTCCGATCTTACCG
TACGT_EcoRI_P1.1	ACACTCTTTCCCTACACGACGCTCTTCCGATCTTACGT
TAGTA_EcoRI_P1.1	ACACTCTTTCCCTACACGACGCTCTTCCGATCTTAGTA
TATAC_EcoRI_P1.1	ACACTCTTTCCCTACACGACGCTCTTCCGATCTTATAC
TCACG_EcoRI_P1.1	ACACTCTTTCCCTACACGACGCTCTTCCGATCTTCACG
TCAGT_EcoRI_P1.1	ACACTCTTTCCCTACACGACGCTCTTCCGATCTTCAGT
TCCGG_EcoRI_P1.1	ACACTCTTTCCCTACACGACGCTCTTCCGATCTTCCGG
TCTGC_EcoRI_P1.1	ACACTCTTTCCCTACACGACGCTCTTCCGATCTTCTGC
TGGAA_EcoRI_P1.1	ACACTCTTTCCCTACACGACGCTCTTCCGATCTTGGAA
TTACC_EcoRI_P1.1	ACACTCTTTCCCTACACGACGCTCTTCCGATCTTTACC
GCATG_EcoRI_P1.2	/5Phos/AATTCATGCAGATCGGAAGAGCGTCGTGTAGGGAAAGAGTGT
AACCA_EcoRI_P1.2	/5Phos/AATTTGGTTAGATCGGAAGAGCGTCGTGTAGGGAAAGAGTGT
CGATC_EcoRI_P1.2	/5Phos/AATTGATCGAGATCGGAAGAGCGTCGTGTAGGGAAAGAGTGT
TCGAT_EcoRI_P1.2	/5Phos/AATTATCGAAGATCGGAAGAGCGTCGTGTAGGGAAAGAGTGT
TGCAT_EcoRI_P1.2	/5Phos/AATTATGCAAGATCGGAAGAGCGTCGTGTAGGGAAAGAGTGT
CAACC_EcoRI_P1.2	/5Phos/AATTGGTTGAGATCGGAAGAGCGTCGTGTAGGGAAAGAGTGT
GGTTG_EcoRI_P1.2	/5Phos/AATTCAACCAGATCGGAAGAGCGTCGTGTAGGGAAAGAGTGT
AAGGA_EcoRI_P1.2	/5Phos/AATTTCCTTAGATCGGAAGAGCGTCGTGTAGGGAAAGAGTGT
AGCTA_EcoRI_P1.2	/5Phos/AATTTAGCTAGATCGGAAGAGCGTCGTGTAGGGAAAGAGTGT
ACACA_EcoRI_P1.2	/5Phos/AATTTGTGTAGATCGGAAGAGCGTCGTGTAGGGAAAGAGTGT
AATTA_EcoRI_P1.2	/5Phos/AATTTAATTAGATCGGAAGAGCGTCGTGTAGGGAAAGAGTGT
ACGGT_EcoRI_P1.2	/5Phos/AATTACCGTAGATCGGAAGAGCGTCGTGTAGGGAAAGAGTGT
ACTGG_EcoRI_P1.2	/5Phos/AATTCCAGTAGATCGGAAGAGCGTCGTGTAGGGAAAGAGTGT
ACTTC_EcoRI_P1.2	/5Phos/AATTGAAGTAGATCGGAAGAGCGTCGTGTAGGGAAAGAGTGT
ATACG_EcoRI_P1.2	/5Phos/AATTCGTATAGATCGGAAGAGCGTCGTGTAGGGAAAGAGTGT
ATGAG_EcoRI_P1.2	/5Phos/AATTCTCATAGATCGGAAGAGCGTCGTGTAGGGAAAGAGTGT
ATTAC_EcoRI_P1.2	/5Phos/AATTGTAATAGATCGGAAGAGCGTCGTGTAGGGAAAGAGTGT
CATAT_EcoRI_P1.2	/5Phos/AATTATATGAGATCGGAAGAGCGTCGTGTAGGGAAAGAGTGT
CGAAT_EcoRI_P1.2	/5Phos/AATTATTCGAGATCGGAAGAGCGTCGTGTAGGGAAAGAGTGT
CGGCT_EcoRI_P1.2	/5Phos/AATTAGCCGAGATCGGAAGAGCGTCGTGTAGGGAAAGAGTGT
CGGTA_EcoRI_P1.2	/5Phos/AATTTACCGAGATCGGAAGAGCGTCGTGTAGGGAAAGAGTGT
CGTAC_EcoRI_P1.2	/5Phos/AATTGTACGAGATCGGAAGAGCGTCGTGTAGGGAAAGAGTGT
CGTCG_EcoRI_P1.2	/5Phos/AATTCGACGAGATCGGAAGAGCGTCGTGTAGGGAAAGAGTGT
CTGAT_EcoRI_P1.2	/5Phos/AATTATCAGAGATCGGAAGAGCGTCGTGTAGGGAAAGAGTGT
CTGCG_EcoRI_P1.2	/5Phos/AATTCGCAGAGATCGGAAGAGCGTCGTGTAGGGAAAGAGTGT
CTGTC_EcoRI_P1.2	/5Phos/AATTGACAGAGATCGGAAGAGCGTCGTGTAGGGAAAGAGTGT
CTTGG_EcoRI_P1.2	/5Phos/AATTCCAAGAGATCGGAAGAGCGTCGTGTAGGGAAAGAGTGT
GACAC_EcoRI_P1.2	/5Phos/AATTGTGTCAGATCGGAAGAGCGTCGTGTAGGGAAAGAGTGT
GAGAT_EcoRI_P1.2	/5Phos/AATTATCTCAGATCGGAAGAGCGTCGTGTAGGGAAAGAGTGT
GAGTC_EcoRI_P1.2	/5Phos/AATTGACTCAGATCGGAAGAGCGTCGTGTAGGGAAAGAGTGT
GCCGT_EcoRI_P1.2	/5Phos/AATTACGGCAGATCGGAAGAGCGTCGTGTAGGGAAAGAGTGT
GCTGA_EcoRI_P1.2	/5Phos/AATTTCAGCAGATCGGAAGAGCGTCGTGTAGGGAAAGAGTGT
GGATA_EcoRI_P1.2	/5Phos/AATTTATCCAGATCGGAAGAGCGTCGTGTAGGGAAAGAGTGT
GGCCA_EcoRI_P1.2	/5Phos/AATTTGGCCAGATCGGAAGAGCGTCGTGTAGGGAAAGAGTGT
GGCTC_EcoRI_P1.2	/5Phos/AATTGAGCCAGATCGGAAGAGCGTCGTGTAGGGAAAGAGTGT
GTAGT_EcoRI_P1.2	/5Phos/AATTACTACAGATCGGAAGAGCGTCGTGTAGGGAAAGAGTGT
GTCCG_EcoRI_P1.2	/5Phos/AATTCGGACAGATCGGAAGAGCGTCGTGTAGGGAAAGAGTGT
GTCGA_EcoRI_P1.2	/5Phos/AATTTCGACAGATCGGAAGAGCGTCGTGTAGGGAAAGAGTGT
TACCG_EcoRI_P1.2	/5Phos/AATTCGGTAAGATCGGAAGAGCGTCGTGTAGGGAAAGAGTGT
TACGT_EcoRI_P1.2	/5Phos/AATTACGTAAGATCGGAAGAGCGTCGTGTAGGGAAAGAGTGT
TAGTA_EcoRI_P1.2	/5Phos/AATTTACTAAGATCGGAAGAGCGTCGTGTAGGGAAAGAGTGT
TATAC_EcoRI_P1.2	/5Phos/AATTGTATAAGATCGGAAGAGCGTCGTGTAGGGAAAGAGTGT
TCACG_EcoRI_P1.2	/5Phos/AATTCGTGAAGATCGGAAGAGCGTCGTGTAGGGAAAGAGTGT
TCAGT_EcoRI_P1.2	/5Phos/AATTACTGAAGATCGGAAGAGCGTCGTGTAGGGAAAGAGTGT
TCCGG_EcoRI_P1.2	/5Phos/AATTCCGGAAGATCGGAAGAGCGTCGTGTAGGGAAAGAGTGT
TCTGC_EcoRI_P1.2	/5Phos/AATTGCAGAAGATCGGAAGAGCGTCGTGTAGGGAAAGAGTGT
TGGAA_EcoRI_P1.2	/5Phos/AATTTTCCAAGATCGGAAGAGCGTCGTGTAGGGAAAGAGTGT
TTACC_EcoRI_P1.2	/5Phos/AATTGGTAAAGATCGGAAGAGCGTCGTGTAGGGAAAGAGTGT

## Sheet: adapter_P2-MspI
Name	OligoSequence
MspI_P2.1	GTGACTGGAGTTCAGACGTGTGCTCTTCCGATCT
MspI_P2.2	/5Phos/CGAGATCGGAAGAGCGAGAACAA

## Sheet: adapter_P1-flex
Name	OligoSequence
GCATG_flex_P1.1	ACACTCTTTCCCTACACGACGCTCTTCCGATCTGCATGCATG
AACCA_flex_P1.1	ACACTCTTTCCCTACACGACGCTCTTCCGATCTAACCACATG
CGATC_flex_P1.1	ACACTCTTTCCCTACACGACGCTCTTCCGATCTCGATCCATG
TCGAT_flex_P1.1	ACACTCTTTCCCTACACGACGCTCTTCCGATCTTCGATCATG
TGCAT_flex_P1.1	ACACTCTTTCCCTACACGACGCTCTTCCGATCTTGCATCATG
CAACC_flex_P1.1	ACACTCTTTCCCTACACGACGCTCTTCCGATCTCAACCCATG
GGTTG_flex_P1.1	ACACTCTTTCCCTACACGACGCTCTTCCGATCTGGTTGCATG
AAGGA_flex_P1.1	ACACTCTTTCCCTACACGACGCTCTTCCGATCTAAGGACATG
AGCTA_flex_P1.1	ACACTCTTTCCCTACACGACGCTCTTCCGATCTAGCTACATG
ACACA_flex_P1.1	ACACTCTTTCCCTACACGACGCTCTTCCGATCTACACACATG
AATTA_flex_P1.1	ACACTCTTTCCCTACACGACGCTCTTCCGATCTAATTACATG
ACGGT_flex_P1.1	ACACTCTTTCCCTACACGACGCTCTTCCGATCTACGGTCATG
ACTGG_flex_P1.1	ACACTCTTTCCCTACACGACGCTCTTCCGATCTACTGGCATG
ACTTC_flex_P1.1	ACACTCTTTCCCTACACGACGCTCTTCCGATCTACTTCCATG
ATACG_flex_P1.1	ACACTCTTTCCCTACACGACGCTCTTCCGATCTATACGCATG
ATGAG_flex_P1.1	ACACTCTTTCCCTACACGACGCTCTTCCGATCTATGAGCATG
ATTAC_flex_P1.1	ACACTCTTTCCCTACACGACGCTCTTCCGATCTATTACCATG
CATAT_flex_P1.1	ACACTCTTTCCCTACACGACGCTCTTCCGATCTCATATCATG
CGAAT_flex_P1.1	ACACTCTTTCCCTACACGACGCTCTTCCGATCTCGAATCATG
CGGCT_flex_P1.1	ACACTCTTTCCCTACACGACGCTCTTCCGATCTCGGCTCATG
CGGTA_flex_P1.1	ACACTCTTTCCCTACACGACGCTCTTCCGATCTCGGTACATG
CGTAC_flex_P1.1	ACACTCTTTCCCTACACGACGCTCTTCCGATCTCGTACCATG
CGTCG_flex_P1.1	ACACTCTTTCCCTACACGACGCTCTTCCGATCTCGTCGCATG
CTGAT_flex_P1.1	ACACTCTTTCCCTACACGACGCTCTTCCGATCTCTGATCATG
CTGCG_flex_P1.1	ACACTCTTTCCCTACACGACGCTCTTCCGATCTCTGCGCATG
CTGTC_flex_P1.1	ACACTCTTTCCCTACACGACGCTCTTCCGATCTCTGTCCATG
CTTGG_flex_P1.1	ACACTCTTTCCCTACACGACGCTCTTCCGATCTCTTGGCATG
GACAC_flex_P1.1	ACACTCTTTCCCTACACGACGCTCTTCCGATCTGACACCATG
GAGAT_flex_P1.1	ACACTCTTTCCCTACACGACGCTCTTCCGATCTGAGATCATG
GAGTC_flex_P1.1	ACACTCTTTCCCTACACGACGCTCTTCCGATCTGAGTCCATG
GCCGT_flex_P1.1	ACACTCTTTCCCTACACGACGCTCTTCCGATCTGCCGTCATG
GCTGA_flex_P1.1	ACACTCTTTCCCTACACGACGCTCTTCCGATCTGCTGACATG
GGATA_flex_P1.1	ACACTCTTTCCCTACACGACGCTCTTCCGATCTGGATACATG
GGCCA_flex_P1.1	ACACTCTTTCCCTACACGACGCTCTTCCGATCTGGCCACATG
GGCTC_flex_P1.1	ACACTCTTTCCCTACACGACGCTCTTCCGATCTGGCTCCATG
GTAGT_flex_P1.1	ACACTCTTTCCCTACACGACGCTCTTCCGATCTGTAGTCATG
GTCCG_flex_P1.1	ACACTCTTTCCCTACACGACGCTCTTCCGATCTGTCCGCATG
GTCGA_flex_P1.1	ACACTCTTTCCCTACACGACGCTCTTCCGATCTGTCGACATG
TACCG_flex_P1.1	ACACTCTTTCCCTACACGACGCTCTTCCGATCTTACCGCATG
TACGT_flex_P1.1	ACACTCTTTCCCTACACGACGCTCTTCCGATCTTACGTCATG
TAGTA_flex_P1.1	ACACTCTTTCCCTACACGACGCTCTTCCGATCTTAGTACATG
TATAC_flex_P1.1	ACACTCTTTCCCTACACGACGCTCTTCCGATCTTATACCATG
TCACG_flex_P1.1	ACACTCTTTCCCTACACGACGCTCTTCCGATCTTCACGCATG
TCAGT_flex_P1.1	ACACTCTTTCCCTACACGACGCTCTTCCGATCTTCAGTCATG
TCCGG_flex_P1.1	ACACTCTTTCCCTACACGACGCTCTTCCGATCTTCCGGCATG
TCTGC_flex_P1.1	ACACTCTTTCCCTACACGACGCTCTTCCGATCTTCTGCCATG
TGGAA_flex_P1.1	ACACTCTTTCCCTACACGACGCTCTTCCGATCTTGGAACATG
TTACC_flex_P1.1	ACACTCTTTCCCTACACGACGCTCTTCCGATCTTTACCCATG
GCATG_flex_P1.2	/5Phos/CATGCAGATCGGAAGAGCGTCGTGTAGGGAAAGAGTGT
AACCA_flex_P1.2	/5Phos/TGGTTAGATCGGAAGAGCGTCGTGTAGGGAAAGAGTGT
CGATC_flex_P1.2	/5Phos/GATCGAGATCGGAAGAGCGTCGTGTAGGGAAAGAGTGT
TCGAT_flex_P1.2	/5Phos/ATCGAAGATCGGAAGAGCGTCGTGTAGGGAAAGAGTGT
TGCAT_flex_P1.2	/5Phos/ATGCAAGATCGGAAGAGCGTCGTGTAGGGAAAGAGTGT
CAACC_flex_P1.2	/5Phos/GGTTGAGATCGGAAGAGCGTCGTGTAGGGAAAGAGTGT
GGTTG_flex_P1.2	/5Phos/CAACCAGATCGGAAGAGCGTCGTGTAGGGAAAGAGTGT
AAGGA_flex_P1.2	/5Phos/TCCTTAGATCGGAAGAGCGTCGTGTAGGGAAAGAGTGT
AGCTA_flex_P1.2	/5Phos/TAGCTAGATCGGAAGAGCGTCGTGTAGGGAAAGAGTGT
ACACA_flex_P1.2	/5Phos/TGTGTAGATCGGAAGAGCGTCGTGTAGGGAAAGAGTGT
AATTA_flex_P1.2	/5Phos/TAATTAGATCGGAAGAGCGTCGTGTAGGGAAAGAGTGT
ACGGT_flex_P1.2	/5Phos/ACCGTAGATCGGAAGAGCGTCGTGTAGGGAAAGAGTGT
ACTGG_flex_P1.2	/5Phos/CCAGTAGATCGGAAGAGCGTCGTGTAGGGAAAGAGTGT
ACTTC_flex_P1.2	/5Phos/GAAGTAGATCGGAAGAGCGTCGTGTAGGGAAAGAGTGT
ATACG_flex_P1.2	/5Phos/CGTATAGATCGGAAGAGCGTCGTGTAGGGAAAGAGTGT
ATGAG_flex_P1.2	/5Phos/CTCATAGATCGGAAGAGCGTCGTGTAGGGAAAGAGTGT
ATTAC_flex_P1.2	/5Phos/GTAATAGATCGGAAGAGCGTCGTGTAGGGAAAGAGTGT
CATAT_flex_P1.2	/5Phos/ATATGAGATCGGAAGAGCGTCGTGTAGGGAAAGAGTGT
CGAAT_flex_P1.2	/5Phos/ATTCGAGATCGGAAGAGCGTCGTGTAGGGAAAGAGTGT
CGGCT_flex_P1.2	/5Phos/AGCCGAGATCGGAAGAGCGTCGTGTAGGGAAAGAGTGT
CGGTA_flex_P1.2	/5Phos/TACCGAGATCGGAAGAGCGTCGTGTAGGGAAAGAGTGT
CGTAC_flex_P1.2	/5Phos/GTACGAGATCGGAAGAGCGTCGTGTAGGGAAAGAGTGT
CGTCG_flex_P1.2	/5Phos/CGACGAGATCGGAAGAGCGTCGTGTAGGGAAAGAGTGT
CTGAT_flex_P1.2	/5Phos/ATCAGAGATCGGAAGAGCGTCGTGTAGGGAAAGAGTGT
CTGCG_flex_P1.2	/5Phos/CGCAGAGATCGGAAGAGCGTCGTGTAGGGAAAGAGTGT
CTGTC_flex_P1.2	/5Phos/GACAGAGATCGGAAGAGCGTCGTGTAGGGAAAGAGTGT
CTTGG_flex_P1.2	/5Phos/CCAAGAGATCGGAAGAGCGTCGTGTAGGGAAAGAGTGT
GACAC_flex_P1.2	/5Phos/GTGTCAGATCGGAAGAGCGTCGTGTAGGGAAAGAGTGT
GAGAT_flex_P1.2	/5Phos/ATCTCAGATCGGAAGAGCGTCGTGTAGGGAAAGAGTGT
GAGTC_flex_P1.2	/5Phos/GACTCAGATCGGAAGAGCGTCGTGTAGGGAAAGAGTGT
GCCGT_flex_P1.2	/5Phos/ACGGCAGATCGGAAGAGCGTCGTGTAGGGAAAGAGTGT
GCTGA_flex_P1.2	/5Phos/TCAGCAGATCGGAAGAGCGTCGTGTAGGGAAAGAGTGT
GGATA_flex_P1.2	/5Phos/TATCCAGATCGGAAGAGCGTCGTGTAGGGAAAGAGTGT
GGCCA_flex_P1.2	/5Phos/TGGCCAGATCGGAAGAGCGTCGTGTAGGGAAAGAGTGT
GGCTC_flex_P1.2	/5Phos/GAGCCAGATCGGAAGAGCGTCGTGTAGGGAAAGAGTGT
GTAGT_flex_P1.2	/5Phos/ACTACAGATCGGAAGAGCGTCGTGTAGGGAAAGAGTGT
GTCCG_flex_P1.2	/5Phos/CGGACAGATCGGAAGAGCGTCGTGTAGGGAAAGAGTGT
GTCGA_flex_P1.2	/5Phos/TCGACAGATCGGAAGAGCGTCGTGTAGGGAAAGAGTGT
TACCG_flex_P1.2	/5Phos/CGGTAAGATCGGAAGAGCGTCGTGTAGGGAAAGAGTGT
TACGT_flex_P1.2	/5Phos/ACGTAAGATCGGAAGAGCGTCGTGTAGGGAAAGAGTGT
TAGTA_flex_P1.2	/5Phos/TACTAAGATCGGAAGAGCGTCGTGTAGGGAAAGAGTGT
TATAC_flex_P1.2	/5Phos/GTATAAGATCGGAAGAGCGTCGTGTAGGGAAAGAGTGT
TCACG_flex_P1.2	/5Phos/CGTGAAGATCGGAAGAGCGTCGTGTAGGGAAAGAGTGT
TCAGT_flex_P1.2	/5Phos/ACTGAAGATCGGAAGAGCGTCGTGTAGGGAAAGAGTGT
TCCGG_flex_P1.2	/5Phos/CCGGAAGATCGGAAGAGCGTCGTGTAGGGAAAGAGTGT
TCTGC_flex_P1.2	/5Phos/GCAGAAGATCGGAAGAGCGTCGTGTAGGGAAAGAGTGT
TGGAA_flex_P1.2	/5Phos/TTCCAAGATCGGAAGAGCGTCGTGTAGGGAAAGAGTGT
TTACC_flex_P1.2	/5Phos/GGTAAAGATCGGAAGAGCGTCGTGTAGGGAAAGAGTGT

## Sheet: adapter_P2-flex
Name	OligoSequence
flex_P2.1	GTGACTGGAGTTCAGACGTGTGCTCTTCCGATCT
flex_P2.2	/5Phos/AATTAGATCGGAAGAGCGAGAACAA

## Sheet: PCR_primers
Name	OligoSequence
PCR1	AATGATACGGCGACCACCGAGATCTACACTCTTTCCCTACACGACG
PCR2_Idx_1_ATCACG	CAAGCAGAAGACGGCATACGAGATCGTGATGTGACTGGAGTTCAGACGTGTGC
PCR2_Idx_2_CGATGT	CAAGCAGAAGACGGCATACGAGATACATCGGTGACTGGAGTTCAGACGTGTGC
PCR2_Idx_3_TTAGGC	CAAGCAGAAGACGGCATACGAGATGCCTAAGTGACTGGAGTTCAGACGTGTGC
PCR2_Idx_4_TGACCA	CAAGCAGAAGACGGCATACGAGATTGGTCAGTGACTGGAGTTCAGACGTGTGC
PCR2_Idx_5_ACAGTG	CAAGCAGAAGACGGCATACGAGATCACTGTGTGACTGGAGTTCAGACGTGTGC
PCR2_Idx_6_GCCAAT	CAAGCAGAAGACGGCATACGAGATATTGGCGTGACTGGAGTTCAGACGTGTGC
PCR2_Idx_7_CAGATC	CAAGCAGAAGACGGCATACGAGATGATCTGGTGACTGGAGTTCAGACGTGTGC
PCR2_Idx_8_ACTTGA	CAAGCAGAAGACGGCATACGAGATTCAAGTGTGACTGGAGTTCAGACGTGTGC
PCR2_Idx_9_GATCAG	CAAGCAGAAGACGGCATACGAGATCTGATCGTGACTGGAGTTCAGACGTGTGC
PCR2_Idx_10_TAGCTT	CAAGCAGAAGACGGCATACGAGATAAGCTAGTGACTGGAGTTCAGACGTGTGC
PCR2_Idx_11_GGCTAC	CAAGCAGAAGACGGCATACGAGATGTAGCCGTGACTGGAGTTCAGACGTGTGC
PCR2_Idx_12_CTTGTA	CAAGCAGAAGACGGCATACGAGATTACAAGGTGACTGGAGTTCAGACGTGTGC
